# Supplementary material for: Young Australian Adults Prefer Video Posts for Dissemination of Nutritional Information over the Social Media Platform Instagram: A Pilot Cross-Sectional Survey
Source: MDPI journal article supplement (doi:10.3390/nu14204382), 2022-10-19
Supplement: s1 [file s1]

**Table S1.** Median (IQR) Rank of Mock Instagram Posts grouped according to participant demographics (gender, age, education, socio-economic status and frequency of Instagram use). Mann-Whitney U tests used to determine if there was a difference between participant characteristics and post rank with a Bonferroni correction applied. Significance indicated by alphabetical superscripts.

|                                                   | Median Rank Post (IQR)          |                              |                                 |                              |                                 |                              |
|---------------------------------------------------|---------------------------------|------------------------------|---------------------------------|------------------------------|---------------------------------|------------------------------|
|                                                   | Text/Icon Only                  |                              | Realistic Image                 |                              | Short Video                     |                              |
| <b>Gender</b><br>( <i>n</i> )                     | Male<br>24                      | Female<br>83                 | Male<br>24                      | Female<br>83                 | Male<br>24                      | Female<br>83                 |
| Engagement                                        | 1.5 (1.0 – 2.0)                 | 1.5 (1 - 2.0)                | 2.0 (2.0 - 2.8)                 | 2.0 (1.0 - 2.0) <sup>A</sup> | 2.5 (2.0 - 3.0)                 | 3.0 (2.0 - 3.0)              |
| Visual Preference                                 | 1.8 (1.0 - 2.3)                 | 2.0 (1.5 - 2.0)              | 2.0 (2.0 - 2.3)                 | 2.0 (1.0 - 2.0)              | 2.0 (2.0 - 3.0)                 | 3.0 (2.0 - 3.0)              |
| Motivation                                        | 1.5 (1.0 - 2.0)                 | 2.0 (1.0 - 2.0)              | 2.0 (2.0 - 2.0)                 | 2.0 (1.0 - 2.0)              | 2.5 (2.0 - 3.0)                 | 3.0 (2.0 - 3.0)              |
| Knowledge Relevancy                               | 1.5 (1.0 - 2.0)                 | 2 (1.0 - 2.0)                | 2.0 (1.8 - 3.0)                 | 2.0 (1.0 - 2.0)              | 2.0 (2.0 - 2.5)                 | 3.0 (2.0 - 3.0)              |
| <b>Age-range</b><br>( <i>n</i> )                  | 18-24<br>49                     | 25-30<br>59                  | 18-24<br>49                     | 25-30<br>59                  | 18-24<br>49                     | 25-30<br>59                  |
| Engagement                                        | 2.0 (1.0 - 2.0)                 | 1.5 (1.0 - 2.0)              | 2.0 (1.5 - 2.0)                 | 2.0 (1.5 - 2.0)              | 3.0 (2.0 - 3.0)                 | 3.0 (2.5 - 3.0)              |
| Visual Preference                                 | 2.0 (1.0 - 2.0)                 | 2.0 (1.0 - 2.0)              | 2.0 (1.0 - 2.0)                 | 2.0 (1.0 - 2.0)              | 3.0 (2.0 - 3.0)                 | 3.0 (2.0 - 3.0)              |
| Motivation                                        | 2.0 (1.0 - 2.0)                 | 1.5 (1.0 - 2.0)              | 2.0 (1.5 - 2.0)                 | 2.0 (1.5 - 2.0)              | 3.0 (2.0 - 3.0)                 | 3.0 (2.0 - 3.0)              |
| Knowledge Relevancy                               | 2.0 (1.0 - 2.0)                 | 2.0 (1.0 - 2.0)              | 2.0 (1.0 - 2.0)                 | 2.0 (1.5 - 2.0)              | 2.5 (1.5 - 3.0)                 | 3.0 (2.0 - 3.0)              |
| <b>Education</b><br>( <i>n</i> )                  | University<br>73                | All other education<br>35    | University<br>73                | All other education<br>35    | University<br>73                | All other education<br>35    |
| Engagement                                        | 1.5 (1.0 - 2.0)                 | 2.0 (1.5 - 2.0) <sup>B</sup> | 2.0 (2.0 - 2.0)                 | 1.5 (1.0 - 2.0) <sup>C</sup> | 3.0 (2.0 - 3.0)                 | 3.0 (2.5 - 3.0)              |
| Visual Preference                                 | 2.0 (1.0 - 2.0)                 | 2.0 (2.0 - 2.0) <sup>C</sup> | 2.0 (1.5 - 2.5)                 | 1.0 (1.0 - 2.0) <sup>C</sup> | 3.0 (2.0 - 3.0)                 | 3.0 (2.0 - 3.0)              |
| Motivation                                        | 1.5 (1.0 - 2.0)                 | 2.0 (1.5 - 2.0) <sup>D</sup> | 2.0 (2.0 - 2.0)                 | 1.5 (1.0 - 2.0) <sup>E</sup> | 3.0 (2.0 - 3.0)                 | 3.0 (2.5 - 3.0)              |
| Knowledge Relevancy                               | 1.5 (1.0 - 2.0)                 | 2.0 (2.0 - 2.0)              | 2.0 (2.0 - 2.5)                 | 1.5 (1.0 - 2.0) <sup>C</sup> | 2.5 (2.0 - 3.0)                 | 3.0 (2.0 - 3.0)              |
| <b>Socio-economic status</b><br>( <i>n</i> )      | Higher<br>82                    | Lower<br>10                  | Higher<br>82                    | Lower<br>10                  | Higher<br>82                    | Lower<br>10                  |
| Engagement                                        | 1.5 (1.0 - 2.0)                 | 2.0 (1.0 - 2.0)              | 2.0 (1.5 - 2.0)                 | 2.0 (2.0 - 3.0)              | 3.0 (2.5 - 3.0)                 | 2.0 (1.0 - 2.5) <sup>F</sup> |
| Visual Preference                                 | 2.0 (1.0 - 2.0)                 | 2.0 (2.0 - 2.0)              | 2.0 (1.0 - 2.0)                 | 2.0 (2.0 - 3.0)              | 3.0 (2.5 - 3.0)                 | 2.3 (1.0 - 3.0)              |
| Motivation                                        | 1.5 (1.0 - 2.0)                 | 2.0 (2.0 - 2.0)              | 2.0 (1.5 - 2.0)                 | 2.0 (2.0 - 3.0)              | 3.0 (2.5 - 3.0)                 | 2.0 (1.0 - 2.5) <sup>F</sup> |
| Knowledge Relevancy                               | 2.0 (1.0 - 2.0)                 | 2.0 (1.0 - 2.0)              | 2.0 (1.0 - 2.0)                 | 2.0 (2.0 - 2.5)              | 3.0 (2.0 - 3.0)                 | 2.0 (1.0 - 2.5) <sup>G</sup> |
| <b>Frequency of Instagram Use</b><br>( <i>n</i> ) | Multiple times per<br>day<br>55 | Once per day or less<br>53   | Multiple times per<br>day<br>55 | Once per day or less<br>53   | Multiple times per<br>day<br>55 | Once per day or less<br>53   |
| Engagement                                        | 1.0 (1.0 - 2.0)                 | 2.0 (1.5 - 2.0) <sup>H</sup> | 2.0 (2.0 - 2.0)                 | 2.0 (1.0 - 2.0) <sup>K</sup> | 3.0 (2.0 - 3.0)                 | 3.0 (2.0 - 3.0)              |
| Visual Preference                                 | 1.5 (1.0 - 2.0)                 | 2.0 (2.0 - 2.0) <sup>I</sup> | 2.0 (2.0 - 2.5)                 | 1.5 (1.0 - 2.0) <sup>J</sup> | 2.5 (2.0 - 3.0)                 | 3.0 (2.5 - 3.0)              |

|                     |                 |                              |                 |                              |                 |                 |
|---------------------|-----------------|------------------------------|-----------------|------------------------------|-----------------|-----------------|
| Motivation          | 1.0 (1.0 - 2.0) | 2.0 (1.5 - 2.0) <sup>J</sup> | 2.0 (2.0 - 2.5) | 1.5 (1.0 - 2.0) <sup>J</sup> | 3.0 (2.0 - 3.0) | 3.0 (2.0 - 3.0) |
| Knowledge Relevancy | 1.5 (1.0 - 2.0) | 2.0 (2.0 - 2.0) <sup>J</sup> | 2.0 (2.0 - 2.5) | 1.5 (1.0 - 2.0) <sup>J</sup> | 2.5 (2.0 - 3.0) | 3.0 (2.0 - 3.0) |

<sup>A</sup> Statistically significant difference between males and females. (A:  $p = 0.013$ )

<sup>B, C, D, E</sup> Statistically significant difference between university and all other education (B:  $p = 0.009$ , C:  $p < 0.001$ , D:  $p = 0.001$ , E:  $p = 0.002$ )

<sup>F, G</sup> Statistically significant difference between higher and lower socio-economic status (F:  $p = 0.001$ , G:  $p = 0.004$ )

<sup>H, I, J, K</sup> Statistically significant difference between using Instagram multiple times per day and once per day or less (H:  $p = 0.002$ , I:  $p = 0.001$ , J:  $p < 0.001$ , K:  $p = 0.013$ )
